# Supplementary material for: Protective action of pomegranate peel polyphenols in type 2 diabetic ratsviathe translocation of Nrf2 and FoxO1 regulated by the PI3K/Akt pathway
Source: Royal Society of Chemistry journal article supplement (doi:10.1039/d1fo01213d), 2021-01-01
Supplement: d1fo01213d1.pdf [file d1fo01213d1.pdf]

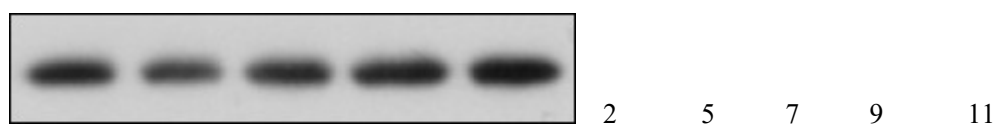

Cyto-Nrf2

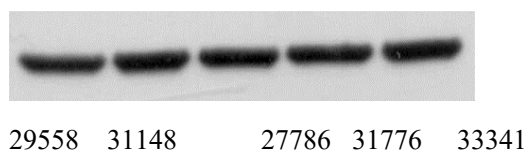

Beta-actin

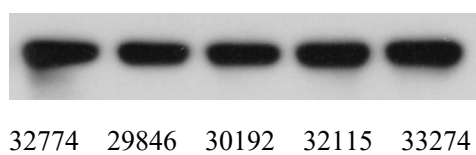

Nucl-Nrf2

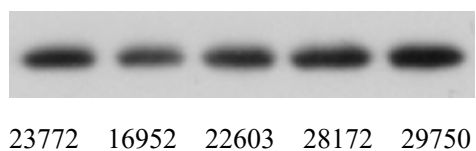

Lamin B

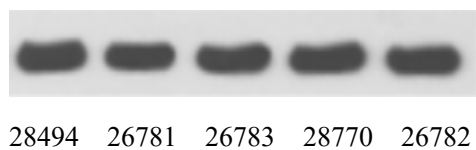

p-Keap1

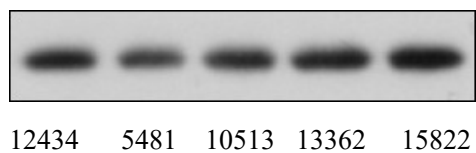

Keap1

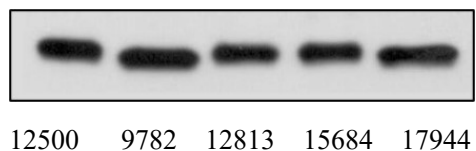

HO-1

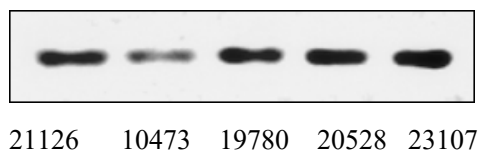

NQO1

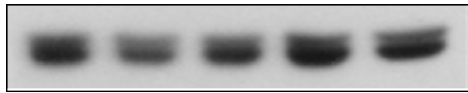

25382 19648 22280 28907 25656

Mn-SOD

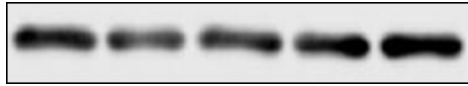

26569 18389 23059 25215 31774

CAT

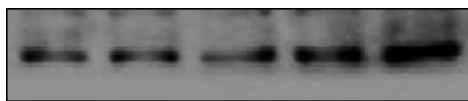

13396 13394 15863 14775 25045
