# Supplementary material for: Protective action of pomegranate peel polyphenols in type 2 diabetic ratsviathe translocation of Nrf2 and FoxO1 regulated by the PI3K/Akt pathway
Source: Royal Society of Chemistry journal article supplement (doi:10.1039/d1fo01213d), 2021-01-01
Supplement: d1fo01213d2.pdf [file d1fo01213d2.pdf]

**Fig.3A**

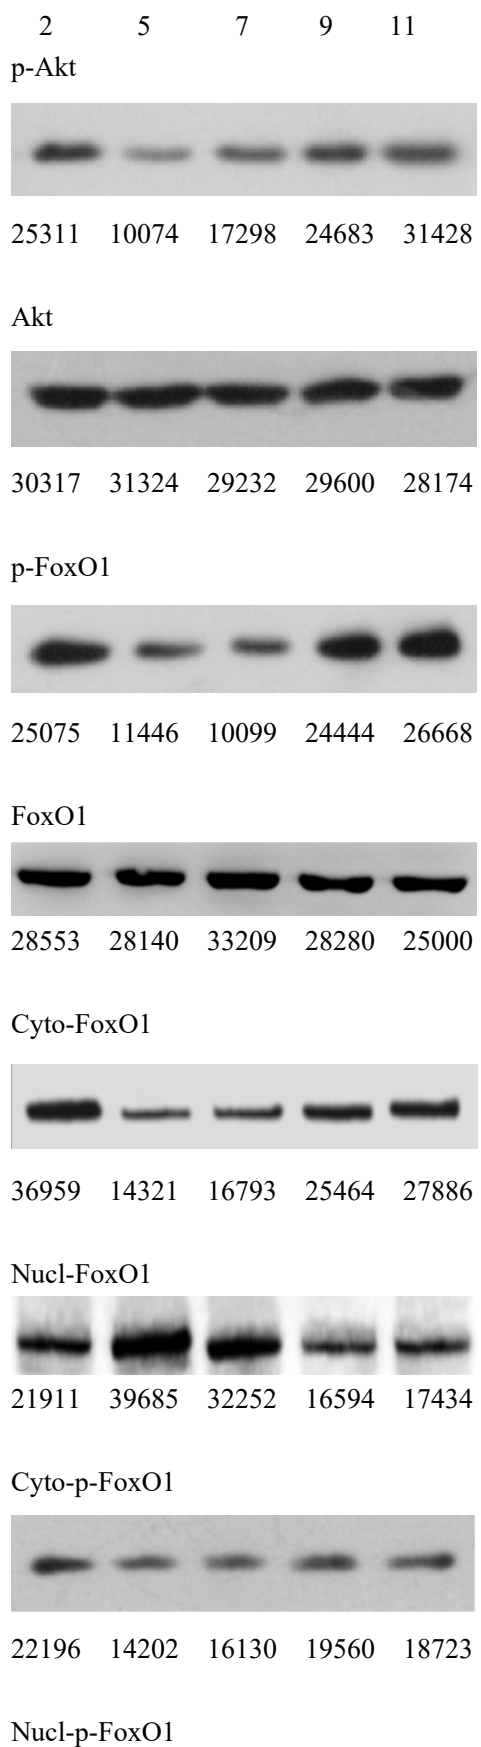

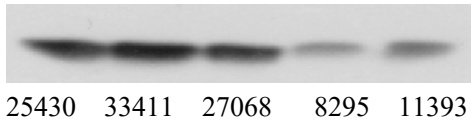

Beta-actin

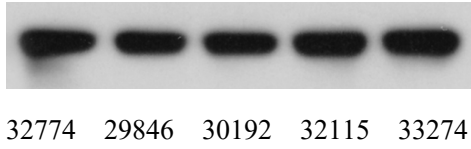

Lamin B

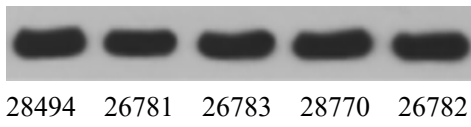

**Fig.3F**

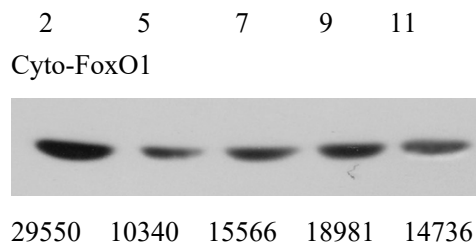

Nucl-FoxO1

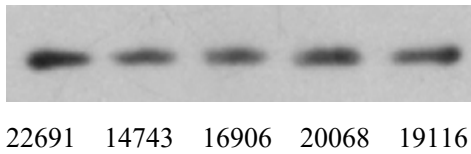

Beta-actin

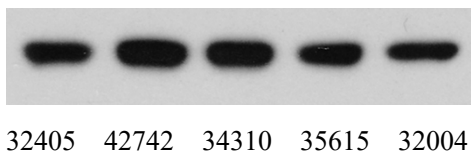

Cyto-p-FoxO1

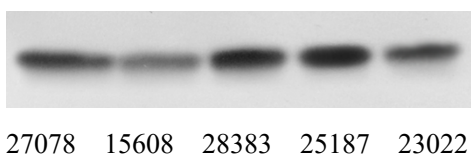

Nucl-p-FoxO1

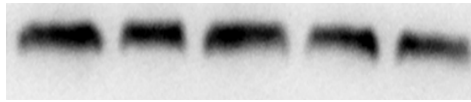

27411 25068 23295 28393 26482

Lamin B

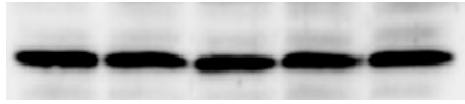

28494 26781 26783 28770 26782

2 5 7 9 11

Cyto-p-FoxO1

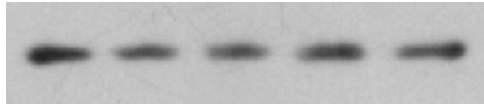

20856 11183 12306 19094 18399
